# Supplementary material for: Selected-control hydrothermal growths of α- and β-PbO crystals and orientated pressure-induced phase transition
Source: Royal Society of Chemistry journal article supplement (doi:10.1039/c2ce26162f), 2012-11-29
Supplement: c2ce26162f.pdf [file c2ce26162f.pdf]

SUPPORTING INFORMATION FOR:

Selected-Control Hydrothermal Growths of  $\alpha$ - and  $\beta$ - PbO Crystals and Oriented Pressure Induced Phase Transition

Yonggang Wang,<sup>a</sup> Xiaohuan Lin,<sup>a</sup> Hao Zhang,<sup>a</sup> Ting Wen,<sup>b</sup> Fuqiang Huang,<sup>a</sup> Guobao Li,<sup>a</sup> Yingxia Wang,<sup>a,\*</sup> Fuhui Liao,<sup>a</sup> and Jianhua Lin <sup>a,\*</sup>

1, Details of the DFT calculation:

Density of states (DOS) calculations were performed using a first-principles plane-wave pseudopotential method based on density functional theory with CASTEP package,<sup>1</sup> and the ion-electron interactions were modeled by the ultrasoft pseudopotentials.<sup>2</sup> Norm-conserving pseudopotentials are adopted with an energy cutoff of 900 eV. K meshes with a density of 0.02 Å<sup>-1</sup> are adopted. Other calculating parameters and convergent criterions were set by the default values of CASTEP code. Unit cell parameters and atomic coordinates of  $\alpha$ - and  $\beta$ - PbO from ICSD-94333 (*P4/nmms*) and ICSD-60135 (*Pbcm*) are adopted as initial structure model. The operation of antistrophic pressures are simulated by varying the interlayer distances of adjacent rock-salt-like blocks, while the bond lengths and bond angles of PbO<sub>4</sub> within the layer are fixed. The interlayer distances (*c* of  $\alpha$ -PbO, *a* of  $\beta$ -PbO), corresponding atom coordinations and E-E<sup>0</sup> are listed in the follows:

| <i>c</i> of $\alpha$ -PbO | <i>z</i> of Pb | E-E <sup>0</sup> | <i>a</i> of $\beta$ -PbO | <i>x</i> of Pb | <i>x</i> of O | E-E <sup>0</sup> |
|---------------------------|----------------|------------------|--------------------------|----------------|---------------|------------------|
| 4.1                       | 0.29219        | 1.37178          | 4.1                      | 0.33016        | -0.19361      | 13.03599         |
| 4.2                       | 0.28523        | 1.09645          | 4.2                      | 0.32230        | -0.18900      | 10.30199         |
| 4.3                       | 0.27860        | 0.86009          | 4.3                      | 0.31480        | -0.18460      | 8.15456          |
| 4.4                       | 0.27226        | 0.65722          | 4.4                      | 0.30765        | -0.18041      | 6.46627          |
| 4.5                       | 0.26621        | 0.49359          | 4.5                      | 0.30081        | -0.17640      | 5.12579          |
| 4.6                       | 0.26043        | 0.34828          | 4.6                      | 0.29427        | -0.17257      | 4.05893          |
| 4.7                       | 0.25489        | 0.22771          | 4.7                      | 0.28801        | -0.16889      | 3.20385          |
| 4.8                       | 0.24958        | 0.15733          | 4.8                      | 0.28201        | -0.16538      | 2.51899          |
| 4.9                       | 0.24448        | 0.07981          | 4.9                      | 0.27625        | -0.16200      | 1.96985          |
| 5.0227                    | 0.23851        | -2.046E-6        | 5.0                      | 0.27073        | -0.15876      | 1.53373          |
| 5.1                       | 0.23489        | -0.04370         | 5.1                      | 0.26542        | -0.15565      | 1.18588          |
| 5.2                       | 0.23038        | -0.04098         | 5.2                      | 0.26032        | -0.15265      | 0.91410          |
| 5.3                       | 0.22603        | -0.06664         | 5.3                      | 0.25540        | -0.14977      | 0.69600          |
| 5.4                       | 0.22185        | -0.08591         | 5.4                      | 0.25068        | -0.14700      | 0.52914          |
| 5.5                       | 0.21781        | -0.10092         | 5.5                      | 0.24612        | -0.14433      | 0.40005          |
| 5.6                       | 0.21392        | -0.11052         | 5.6                      | 0.24172        | -0.14175      | 0.30520          |
| 5.7                       | 0.21017        | -0.11856         | 5.7                      | 0.23748        | -0.13926      | 0.23664          |
| 5.8                       | 0.20655        | -0.10423         | 5.8                      | 0.23339        | -0.13686      | 0.17825          |
| 5.9                       | 0.20304        | -0.10924         | 5.8931                   | 0.22970        | -0.13470      | 0.14116          |
| 6.0                       | 0.19966        | -0.11072         | 6.0                      | 0.22561        | -0.13230      | 0.11297          |
| 6.1                       | 0.19639        | -0.08299         | 6.1                      | 0.22191        | -0.13013      | 0.10201          |
| 6.2                       | 0.19322        | -0.07924         | 6.2                      | 0.21833        | -0.12803      | 0.08850          |
| 6.3                       | 0.19015        | -0.07469         | 6.3                      | 0.21486        | -0.12600      | 0.07900          |
| 6.4                       | 0.18718        | -0.07138         | 6.4                      | 0.21151        | -0.12403      | 0.07314          |
| 6.5                       | 0.18430        | -0.07108         | 6.5                      | 0.20825        | -0.12212      | 0.07046          |

Reference:

(1) S. J. Clark, M. D. Segall, C. J. Pickard, P. J. Hasnip, M. J. Probert, K. Refson, M. C. Payne, *Z. Kristallogr.*, 2005, **220**, 567.  
(2) D. Vanderbilt, *Phys. Rev. B*, 1990, **41**, 7892.

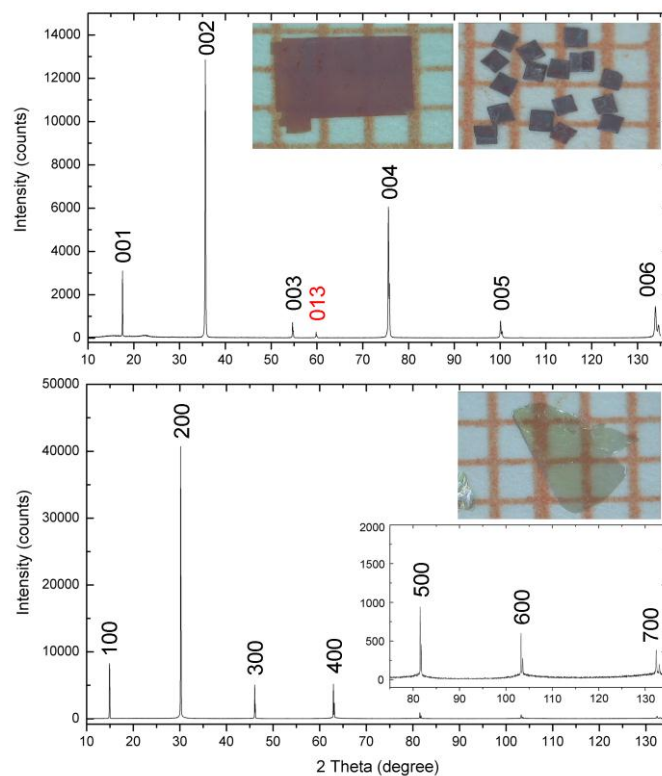

**Figure S1.** X-ray diffraction pattern of  $\alpha$ - (up) and  $\beta$ - (down) PbO single crystals along the direction of the sheets. Insert shows the images of the as-grown crystals.

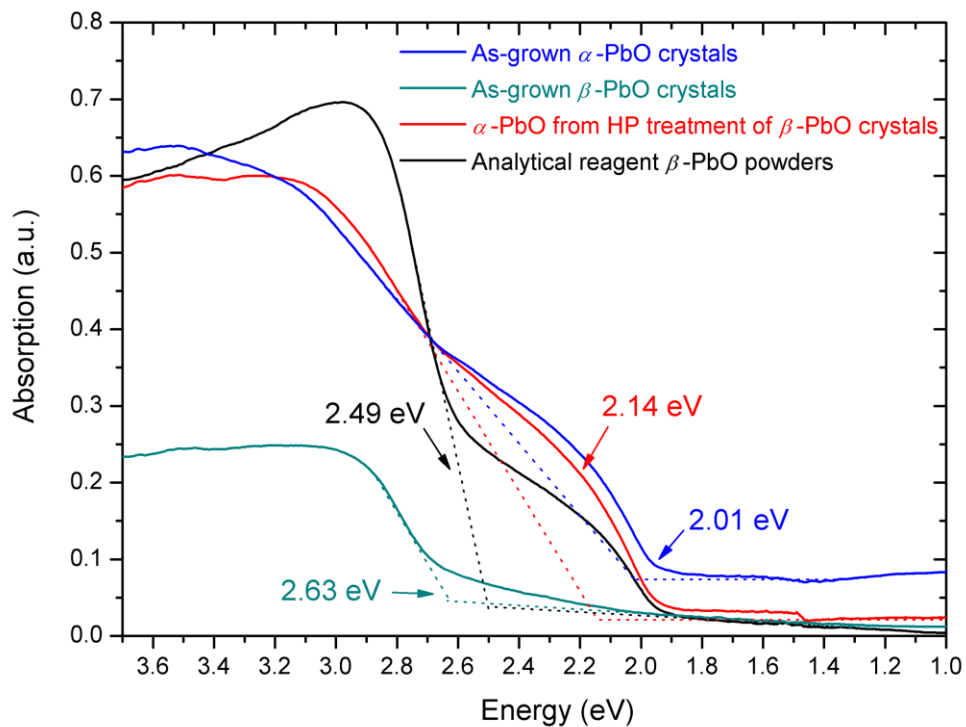

**Figure S2.** UV-visible absorption spectra of as-grown  $\alpha$ - and  $\beta$ - PbO single crystals,  $\alpha$ - PbO powders obtained from phase transition of  $\beta$ - PbO crystals, and commercial analytical pure  $\beta$ - PbO reagent.

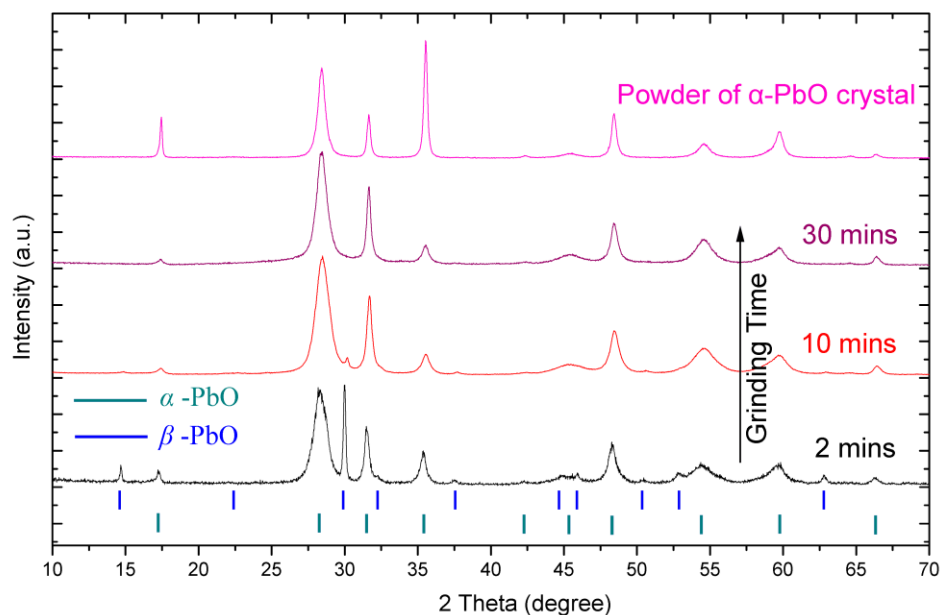

**Figure S3.** X-ray diffraction patterns of  $\beta$ -PbO crystal as a function of grinding time. The short vertical bars represent the theoretical Bragg reflection positions of  $\alpha$ - and  $\beta$ -PbO, respectively.

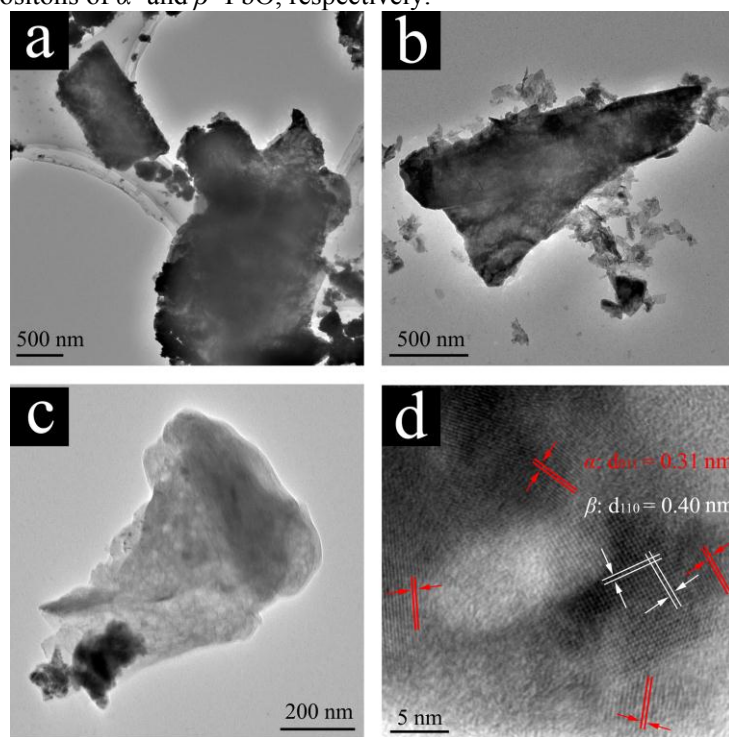

**Figure S4.** TEM images of  $\alpha$ -PbO (a) and  $\beta$ -PbO (b, c) crystal sheets. (d), HRTEM image of  $\beta$ -PbO after being treated by pressure perpendicular to the crystal sheet.
